# Supplementary material for: Profiling of immune dysfunction in COVID-19 patients allows early prediction of disease progression
Source: Life Sci Alliance. 2020 Dec 24;4(2):e202000955. doi: 10.26508/lsa.202000955 (PMC7768198; doi:10.26508/lsa.202000955)
Supplement: Supplementary file 1 [file LSA-2020-00955_TableS1.xlsx]

## Sheet: Patient data summary
Variable	Negative	Mild	Severe	Convalescent	Statistic	P-value (class)
Sex: male	3 (5.26%)*	12 (21.05%)	10 (17.54%)	6 (10.53%)	0.20	2.70e-02 (negative)
Sex: female	9 (15.79%)*	9 (15.79%)	5 (8.77%)	3 (5.26%)	4.94	2.70e-02 (negative)
Age	29.50 (19.50-39.50)	64.00 (38.00-90.00)*	65.00 (50.00-80.00)*	53.00 (35.00-71.00)*	9.00; -2.27	8.46e-05 (severe)
Race: Asian		2 (4.76%)	6 (14.29%)*	0 (0.00%)	8.33	1.64e-02 (severe)
Race: Black		5 (11.90%)	0 (0.00%)	1 (2.38%)	0.00	7.28e-02 (severe)
Race: Hispanic		2 (4.76%)	5 (11.90%)	0 (0.00%)	6.25	7.72e-02 (severe)
Race: White		11 (26.19%)	4 (9.52%)	6 (14.29%)	0.21	5.16e-02 (severe)
Tocilizumab		0 (0.00%)*	8 (17.02%)*	0 (0.00%)	inf	2.05e-05 (severe)
Hospitalization		14 (31.11%)	15 (33.33%)*	1 (2.22%)*	0.03	2.23e-04 (convalescent)
Intubation		0 (0.00%)*	9 (20.00%)*	0 (0.00%)	inf	5.65e-06 (severe)
Death		0 (0.00%)	5 (11.11%)*	0 (0.00%)	inf	2.46e-03 (severe)
Hypertension		8 (23.53%)	8 (23.53%)	0 (0.00%)	0.50	4.87e-01 (mild)
Obesity: overweight		9 (21.95%)	3 (7.32%)	4 (9.76%)	0.41	3.05e-01 (severe)
Obesity: obese		5 (12.20%)	3 (7.32%)	0 (0.00%)	0.00	3.18e-01 (convalescent)
Obesity: nonobese		6 (14.63%)	6 (14.63%)	4 (9.76%)	0.39	2.08e-01 (mild)
BMI		28.77 (23.81-33.74)	26.72 (21.42-32.02)	25.76 (23.61-27.92)	114.00; 0.51	8.84e-02 (convalescent)
Diabetes		4 (10.26%)	5 (12.82%)	0 (0.00%)	2.50	2.66e-01 (severe)
WBC_CBC		5.80 (3.95-7.65)	12.28 (2.78-21.78)*		77.50; -0.93	2.51e-02 (severe)
Lymphocytes_CBC		21.64 (5.81-37.46)	10.21 (1.01-19.41)*		221.00; 1.07	1.99e-03 (severe)
Neutrophils_CBC		65.95 (45.57-86.32)	76.17 (59.02-93.32)*		65.00; -0.59	1.20e-02 (severe)
Days since symptoms (first sample)		18.38 (8.38-28.38)	27.93 (13.43-42.43)	57.67 (-8.33-123.67)*	22.00; -1.46	1.11e-03 (convalescent)
Statistic/P-value: Fisher’s exact test for categorical variables and Mann-Whitney U for continuous variables.
Values in parenthesis represent percentages for categorical variables and interquantile range for continuous variables.
The Statistic and P-value column represent the value for the class with lowest p-value (indicated in the parenthesis in the “P-value” column).
* p < 0.05 for comparing each value to the “Negative” class or to “Mild” when values for “Negative” were not available.
