# Supplementary material for: Profiling of immune dysfunction in COVID-19 patients allows early prediction of disease progression
Source: Life Sci Alliance. 2020 Dec 24;4(2):e202000955. doi: 10.26508/lsa.202000955 (PMC7768198; doi:10.26508/lsa.202000955)
Supplement: Supplementary file 3 [file LSA-2020-00955_TableS3.xlsx]

## Sheet: Immune panels
Index/Panels	Checkpoint	IgM	KIR	MDSC	Memory	Tfol	Treg
1	CD3(FITC-A)	sIgG(FITC-A)	CD158e(FITC-A)	CD15(FITC-A)	CD3(FITC-A)	CD7(FITC-A)	sCD3(FITC-A)
2	CD152(PE-A)	CD25(PE-A)	CD158b(PE-A)	CD33(PE-A)	CD25(PE-A)	CD185(PE-A)	CD25(PE-A)
3	TIGIT(PerCP-Cy5-5-A)	CD27(PerCP-Cy5-5-A)	CD158a(PerCP-Cy5-5-A)	HLA-DR(PerCP-Cy5-5-A)	CD45RO(PerCP-Cy5-5-A)	CD278(PerCP-Cy5-5-A)	CD56(PerCP-Cy5-5-A)
4	CD366(PE-Cy7-A)	CD10(PE-Cy7-A)	CD159a(PE-Cy7-A)	CD3 + CD19 + CD56(PE-Cy7-A)	CD45RA(PE-Cy7-A)	sCD3(PE-Cy7-A)	CD4(PE-Cy7-A)
5	VISTA(APC-A)	sIgM(APC-A)	CD158i(APC-A)	CD11b(APC-A)	CD197(APC-A)	CD10(APC-A)	CD127(APC-A)
6	Viablity Dye(APC-R700-A)	Viability(APC-R700-A)	Viability(APC-R700-A)	Viability(APC-R700-A)	Viability(APC-R700-A)	Viability(APC-R700-A)	Viability(APC-R700-A)
7	CD8(APC-H7-A)	CD20(APC-H7-A)	sCD3(APC-H7-A)	CD14(APC-H7-A)	CD8(APC-H7-A)	CD8(APC-H7-A)	CD8(APC-H7-A)
8	CD279 BV421(Pacific Blue-A)	CD19 BV421(Pacific Blue-A)	CD56 BV421(Pacific Blue-A)	CD124 BV421(Pacific Blue-A)	CD95 BV421(Pacific Blue-A)	CD279 BV421(Pacific Blue-A)	CD16(Pacific Blue-A)
9	CD223 BV510(V500C-A)	CD45(V500C-A)	CD45(V500C-A)	CD45(V500C-A)	CD62L BV510(V500C-A)	CD45(V500C-A)	CD45(V500C-A)
10	CD4(BV605-A)	CD5(BV605-A)	CD16(BV605-A)	CD16(BV605-A)	CD4(BV605-A)	CD4(BV605-A)
