# Supplementary material for: Profiling of immune dysfunction in COVID-19 patients allows early prediction of disease progression
Source: Life Sci Alliance. 2020 Dec 24;4(2):e202000955. doi: 10.26508/lsa.202000955 (PMC7768198; doi:10.26508/lsa.202000955)
Supplement: Supplementary file 5 [file LSA-2020-00955_TableS5.xlsx]

## Sheet: Immune populations
sample_name	All_NK/LY	CD127_dim_CD25_Br/CD3+	CD127_dim_CD25_Br/CD4+	CD127_dim_CD25_Br/LY	CD158a/CD56+_CD16_Br	CD158a/LY	CD158b/CD56+_CD16_Br	CD158b/LY	CD158e/CD56+_CD16_Br	CD158e/LY	CD158i/CD56+_CD16_Br	CD158i/LY	CD159a_(NKG2a)/CD56+_CD16_Br	CD159a_(NKG2a)/LY	CD185+/CD4+	CD185+/LY	CD19+_CD20+/All_CD45	CD19+_CD20+/LY	CD19+_CD20-/All_CD45	CD3+/LY	CD4+/CD3+	CD4+/CD8+	CD4+_CD8+/CD3+	CD45RA+_CD4+/CD3+	CD45RA+_CD4+/CD4+	CD45RA+_CD4+/CD45RO+_CD4+	CD45RA+_CD8+/CD3+	CD45RA+_CD8+/CD45RO+_CD8+	CD45RA+_CD8+/CD8+	CD45RO+_CD4+/CD3+	CD45RO+_CD4+/CD4+	CD45RO+_CD8+/CD3+	CD45RO+_CD8+/CD8+	CD56+_CD16_Br/All_NK	CD62L+_CD197+_/CD45RA+_CD4+	CD62L+_CD197+_/CD45RA+_CD8+	CD62L+_CD197+_/CD45RO+_CD4+	CD62L+_CD197+_/CD45RO+_CD8+	CD62L+_CD197+__CD45RA+_CD4+/CD3+	CD62L+_CD197+__CD45RA+_CD8+/CD3+	CD62L+_CD197+__CD45RO+_CD4+/CD3+	CD62L+_CD197+__CD45RO+_CD8+/CD3+	CD62L+_CD197-_/CD45RA+_CD4+	CD62L+_CD197-_/CD45RA+_CD8+	CD62L+_CD197-_/CD45RO+_CD4+	CD62L+_CD197-_/CD45RO+_CD8+	CD62L+_CD197-__CD45RA+_CD4+/CD3+	CD62L+_CD197-__CD45RA+_CD8+/CD3+	CD62L+_CD197-__CD45RO+_CD4+/CD3+
P028-S129-R01	21.2146	6.56105	11.5372	4.11942	32.9479	6.85436	39.9253	8.3059	20.1394	4.18973	0.00752408	0.00156528	48.7786	10.1477	11.4072	11.4072	3.96567	14.5805	0.0773368	62.2057	53.0295	1.25314	0.298082	12.2692	26.165	0.684312	28.5794	2.3378	60.072	17.9293	38.2354	12.2249	25.696	96.9477	99.2311	96.1805	50.4241	7.92126	12.1749	27.4878	9.04068	0.968369	0.156912	2.18255	16.7508	13.6535	0.0192519	0.623761	3.00329
P028-S130-R01	21.3358	6.97153	12.2017	4.49535	33.6395	6.92346	38.4028	7.90381	20.3218	4.1825	0.004898	0.00100807	48.3114	9.94314	9.7125	9.7125	4.87806	13.2974	0.105651	62.5385	52.9825	1.26873	0.30376	12.9634	27.5632	0.657603	27.3886	1.95329	56.7162	19.7131	41.9146	14.0218	29.0362	97.0822	99.4287	95.844	55.2699	8.7434	12.8893	26.2503	10.8954	1.22598	0.195459	2.41247	16.8183	15.1793	0.0253382	0.660741	3.3154
P028-S131-R01	21.1218	6.97846	12.3061	4.41878	34.0733	7.09636	38.6374	8.04692	19.3319	4.02622	0.00794681	0.00165506	46.7802	9.7428	9.7527	9.7527	5.1199	14.9825	0.0941084	63.6787	52.8406	1.22619	0.251297	11.5567	24.1508	0.552794	28.4879	2.095	59.1122	20.906	43.6886	13.598	28.2159	97.0614	99.4841	96.7162	58.6949	10.1576	11.4971	27.5524	12.2707	1.38124	0.049134	1.70421	16.4596	15.6697	0.00567827	0.485492	3.44103
P029-S132-R01	5.40105	4.45147	6.96479	3.58665	20.7781	1.06464	32.4782	1.66413	5.77248	0.295773	19.5517	1.0018	61.3124	3.14154	11.7851	11.7851	4.36	11.6747	0.0492749	80.3033	59.6411	2.11764	1.30661	14.1233	25.8898	0.47789	18.5025	3.58124	58.7528	29.5533	54.1752	5.1665	16.4057	89.9275	94.6742	37.0557	50.5085	30.5582	13.3711	6.85623	14.927	1.57879	1.94081	25.3897	10.8321	12.481	0.274106	4.69773	3.20124
P030-S133-R01	10.939	4.08728	7.73083	3.17847	29.9498	3.22739	32.9624	3.55204	0.0135704	0.00146234	0	0	49.3554	5.31855	13.0658	13.0658	2.46076	8.19801	0.182429	77.881	50.4164	1.19216	2.34951	12.759	27.7189	0.536033	19.2764	1.53433	41.4349	23.8026	51.7112	12.5634	27.0053	91.5153	98.1958	69.9518	40.4369	11.3355	12.5288	13.4842	9.62504	1.42413	0.412999	4.74786	13.3877	14.7903	0.0526943	0.915218	3.18662
P030-S134-R01	14.4056	3.81647	7.50508	2.90678	31.1177	4.21596	31.9001	4.32197	0.00358912	0.00048627	0.00358912	0.00048627	51.8305	7.02223	11.1168	11.1168	1.50064	5.96699	0.174094	75.8533	46.1714	1.04351	3.07392	10.4135	25.8001	0.467579	19.4504	1.581	39.0062	22.2711	55.178	12.3026	24.6719	92.822	96.5248	56.9038	34.9946	9.62702	10.0516	11.068	7.79367	1.18437	0.714998	8.03881	14.7566	15.468	0.0744563	1.56358	3.28647
P030-S135-R01	12.286	3.56204	6.77973	2.6936	29.9091	3.35422	32.2759	3.61966	0	0	0.00547885	0.000614439	54.9748	6.16528	13.0511	13.0511	2.73035	8.31844	0.218198	74.9646	48.8201	1.13932	2.62698	12.3563	28.6867	0.552594	20.9038	1.98897	43.1237	22.3605	51.9128	10.5098	21.6814	92.3037	97.138	63.3432	40.7295	13.0727	12.0026	13.2411	9.10733	1.37392	1.02302	5.32719	11.6428	17.4542	0.126407	1.11359	2.60338
P031-S136-R01	7.86928	3.45962	5.34126	2.67471	44.5924	3.33191	39.5627	2.9561	39.8167	2.97507	80.9403	6.0478	68.558	5.1226	3.59279	3.59279	5.77396	13.6163	0.0709521	76.0917	62.4171	1.95888	0.980864	16.116	27.6731	0.609529	23.7385	3.87705	64.8927	26.4401	45.4008	6.12282	16.7377	87.0089	99.7865	96.6198	46.8312	14.4108	16.0816	22.936	12.3822	0.88235	0.0125573	1.4919	11.4007	10.114	0.00202374	0.354154	3.01436
P031-S137-R01	9.76941	3.69519	5.74316	2.72881	44.4963	4.10449	38.6265	3.56304	39.6242	3.65507	81.0317	7.47464	67.9599	6.26885	4.69802	4.69802	4.3479	13.1516	0.0387265	73.8161	60.104	1.80449	1.01646	10.3186	18.6646	0.354292	21.0697	2.22668	55.2547	29.1246	52.6816	9.46238	24.8148	90.256	99.5639	94.3284	43.2146	8.25627	10.2736	19.8748	12.5861	0.78124	0	2.17727	11.1116	7.62219	0	0.458744	3.23621
P031-S138-R01	9.06523	4.04859	6.23989	3.11638	44.402	3.71323	38.8958	3.25276	39.1014	3.26995	80.4934	6.73146	67.6896	5.66071	7.79214	7.79214	5.07591	12.7376	0.0510929	76.4051	62.1689	1.92091	0.989219	12.1481	20.8926	0.431884	20.2281	2.39355	55.9859	28.1282	48.3755	8.45109	23.3903	88.3702	99.6709	95.3366	45.6092	15.479	12.1081	19.2848	12.8291	1.30814	0.0205698	2.56949	12.0597	12.0639	0.00249884	0.51976	3.39218
P035-S145-R01	9.12102	4.34697	6.80709	3.18626	21.7047	1.7626	30.2518	2.45669	27.5275	2.23545	0.00389742	0.000316502	44.4111	3.60654	9.85773	9.85773	9.09121	16.66	0.0381877	72.9642	62.5299	1.90139	0.745862	28.6403	47.1989	1.6102	25.7244	6.36609	73.6456	17.7868	29.3124	4.04086	11.5684	88.7387	97.397	91.7206	61.6952	24.9208	27.8948	23.5946	10.9736	1.00701	0.203101	4.52867	10.027	13.3386	0.0581687	1.16497	1.78348
P035-S145-R02	9.05537	3.90752	6.12642	2.8483	21.7607	1.76798	30.1972	2.45342	27.8725	2.26455	0.00458505	0.00037252	42.7877	3.47636	9.34296	9.34296	8.4588	16.6778	0.0418932	72.933	62.3067	1.88737	0.719547	31.143	51.3675	1.79324	25.9548	6.7242	74.7513	17.3669	28.6451	3.85991	11.1167	88.8411	97.4183	88.8802	54.9308	25.242	30.339	23.0687	9.5398	0.974321	0.421709	3.87115	18.9302	17.7455	0.131333	1.00475	3.2876
P035-S145-R03	9.26209	3.97083	6.20457	2.92118	22.0951	1.81333	30.806	2.52823	27.582	2.26363	0	0	43.8304	3.59713	8.90824	8.90824	8.25337	16.8076	0.0441552	73.601	62.8073	1.92531	0.716637	33.4571	54.0823	1.97102	25.3392	7.02485	75.6164	16.9745	27.4388	3.60708	10.7641	88.9021	97.5454	87.7042	56.8513	25.8361	32.6359	22.2236	9.65025	0.931931	0.24811	4.03818	18.0452	19.5612	0.0830105	1.02324	3.06309
P036-S146-R01	5.53282	6.54657	10.1131	5.33829	59.4859	3.12051	81.8664	4.29455	7.82341	0.410401	0	0	22.185	1.16378	17.6119	17.6119	2.94096	11.2822	0.0872798	81.668	62.6791	1.79817	0.676399	9.6484	15.882	0.269763	14.9498	1.03839	40.7336	35.7662	58.8739	14.397	39.2275	95.6277	98.6625	89.6676	61.3813	17.7324	9.51936	13.4051	21.9538	2.55294	0.0898293	3.40119	7.31556	11.8194	0.0086671	0.50847	2.6165
P036-S146-R02	5.42359	6.7396	10.3923	5.48806	58.2092	2.96118	80.7041	4.10553	7.22749	0.367672	0	0	23.1381	1.17707	17	17	2.96328	11.0266	0.0993131	81.2773	62.9515	1.81876	0.668043	12.2872	20.3764	0.340946	16.3981	1.16414	44.0085	36.0386	59.7644	14.086	37.8034	95.4312	97.5234	87.1021	54.6788	18.0518	11.9829	14.2831	19.7054	2.54278	0.141019	3.89645	10.7428	12.0858	0.0173273	0.638943	3.87156
P036-S146-R03	5.49876	6.89169	10.6874	5.62037	58.0158	2.94476	81.4796	4.13574	7.4322	0.377243	0.0171644	0.000871232	21.5929	1.09601	16.907	16.907	2.96125	11.1243	0.0984156	81.4686	62.333	1.77177	0.668389	10.3405	17.4027	0.286473	16.0291	1.08128	42.0758	36.0958	60.7483	14.8242	38.9128	95.1647	98.6123	88.724	59.7914	18.0667	10.197	14.2217	21.5822	2.67824	0.0760384	3.98553	8.7159	12.8158	0.00786272	0.638846	3.14607
P042-S184-R01	9.73868	4.76222	9.79859	3.82269	20.4723	1.79842	23.2231	2.04008	16.982	1.49182	37.1045	3.25951	31.5948	2.77551	8.99133	8.99133	2.18078	8.35486	0.0436938	80.0992	46.1165	1.1654	0.997388	11.15	25.5358	0.471442	16.944	1.11575	40.8114	23.6508	54.1652	15.1862	36.5775	88.9693	98.8611	83.608	60.8472	21.2724	11.023	14.1666	14.3909	3.23048	0.159851	9.54593	10.6415	15.502	0.0178233	1.61747	2.5168
P042-S184-R02	9.64127	5.20575	10.7635	4.14502	20.595	1.77124	23.044	1.98186	17.5214	1.50689	36.4645	3.13607	31.5911	2.71693	6.62701	6.62701	2.15379	8.13866	0.0409617	79.0143	47.1843	1.21758	1.01065	12.8137	27.9147	0.523602	17.059	1.24352	43.0062	24.4722	53.3128	13.7183	34.5843	87.5001	98.4385	81.9909	56.7905	22.1142	12.6136	13.9868	13.8979	3.0337	0.133458	10.3353	12.987	15.1708	0.0171009	1.7631	3.1782
P042-S184-R03	9.69416	5.16554	10.6006	4.1318	20.6448	1.73882	23.5572	1.98412	16.8941	1.42292	35.8302	3.01782	31.5529	2.65757	7.65036	7.65036	1.79784	8.27729	0.0297395	79.0391	47.6756	1.25944	0.901798	13.3053	28.4304	0.553625	17.0132	1.36186	44.3833	24.033	51.3533	12.4926	32.5902	87.6685	97.0827	81.928	53.8607	19.5149	12.9171	13.9386	12.9443	2.43792	0.136484	10.4937	14.2385	20.8413	0.0181595	1.78531	3.42194
P043-S185-R01	15.5845	4.27184	9.08728	3.11177	17.7035	2.57498	66.9705	9.74089	22.4971	3.27221	40.0463	5.82475	19.0828	2.7756	2.87412	2.87412	2.01073	7.35105	0.102108	71.1007	42.9078	0.962971	3.34028	12.2522	31.4308	0.783913	28.7833	4.94084	57.3689	15.6296	40.0948	5.82559	11.6112	96.1647	97.4797	41.9157	48.827	15.0497	11.9434	12.0647	7.63144	0.876733	0.0225023	27.2605	9.36673	36.1098	0.00275702	7.84649	1.46398
P043-S185-R02	15.4222	4.08303	8.74113	2.96576	17.7034	2.57857	66.9291	9.74848	22.5151	3.27942	30.1341	4.38915	19.2417	2.80263	2.47988	2.47988	1.98544	7.62184	0.101152	72.1175	42.6086	0.954017	3.67123	11.7865	31.0527	0.721723	26.9617	3.43157	55.4389	16.331	43.0258	7.85697	16.1556	95.6626	97.9366	44.2523	51.6308	12.9957	11.5433	11.9312	8.43182	1.02106	0.102319	26.1369	8.18462	35.9171	0.0120598	7.04695	1.33663
P043-S185-R03	15.3287	4.77846	10.2894	3.49191	18.1478	2.61395	66.9046	9.63673	22.1904	3.19623	38.9224	5.60626	20.523	2.95607	2.05507	2.05507	1.80122	7.58804	0.0814978	72.4085	43.4152	0.984083	3.56884	12.3415	30.1468	0.646884	25.5107	3.06639	55.8971	19.0783	46.6031	8.31943	18.2289	95.3884	95.59	49.0507	51.1887	13.454	11.7972	12.5132	9.76594	1.1193	0.0262502	23.1951	11.1224	36.3707	0.00323965	5.91723	2.12197
P046-S198-R01	14.7057	5.47932	9.23731	4.203	25.2701	3.45273	26.897	3.67503	17.7156	2.42053	0.0168159	0.00229761	72.2832	9.87627	14.6529	14.6529	1.61522	6.44045	0.0232093	76.3561	52.4241	1.4258	1.24917	14.3346	31.3608	0.727194	21.2474	2.65482	48.9194	19.7122	43.1258	8.00334	18.4266	93.796	98.5979	61.1352	50.4068	7.24018	14.1336	12.9897	9.93628	0.579456	0.671241	14.4913	11.5414	14.133	0.0962196	3.07903	2.27506
P047-S199-R01	5.85011	3.28735	8.22552	2.73934	9.91887	0.544017	37.6956	2.06748	8.28665	0.454495	37.1064	2.03516	53.786	2.94998	17.8166	17.8166	4.05861	9.62242	0.0651584	83.056	37.7726	0.724662	0.393913	12.0758	34.6402	0.665167	27.0699	1.81953	49.2798	18.1546	52.0774	14.8774	27.0838	91.7569	96.3883	71.2097	41.39	10.6678	11.6397	19.2764	7.51419	1.58709	0.311259	2.71241	9.45599	13.2204	0.0375872	0.734246	1.7167
P095-S272-R01	16.6004	4.93374	6.51842	3.5949	26.2365	4.12384	39.6303	6.22906	28.7862	4.5246	0.0244158	0.00383766	14.489	2.27737	17.0835	17.0835	2.34966	8.61804	0.0411743	71.5516	72.1701	2.96635	0.690021	3.58395	5.4162	0.0850046	9.19769	0.686201	30.1544	42.1619	63.7166	13.4038	43.9439	91.7998	98.6595	88.4826	65.6449	28.0108	3.53591	8.13836	27.6772	3.7545	0.201072	7.62601	10.278	16.5412	0.00720634	0.701417	4.33341
P096-S273-R01	17.3292	5.23409	6.50075	3.47061	36.8884	6.38108	44.5667	7.7093	10.4828	1.81334	0.013614	0.00235499	23.4596	4.05812	10.2379	10.2379	5.72463	14.4011	0.0791313	65.2994	79.5664	4.55315	0.563915	16.4863	21.2229	0.561568	7.68203	0.907817	40.3253	29.3577	37.7922	8.46209	44.42	96.8566	99.4727	93.7757	58.1274	18.3618	16.3994	7.20388	17.0649	1.55379	0.0143816	3.34362	17.9804	12.1696	0.002371	0.256858	5.27863
P008-S107-R01	12.8233	3.31655	6.09771	2.37846	28.658	3.58734	35.5418	4.44904	21.0836	2.6392	70.211	8.78884	18.4487	2.30936	12.0549	12.0549	4.83597	12.9236	0.217822	70.6129	52.5874	1.22676	1.51737	9.83417	19.4821	0.281201	14.2222	0.718513	31.7692	34.972	69.2818	19.7939	44.2152	96.0499	97.8413	51.5552	26.2927	2.51558	9.62188	7.33228	9.19508	0.497933	0.22604	6.0644	11.4635	5.86782	0.0222291	0.862491	4.00903
P009-S108-R01	7.34202	4.75783	8.66319	4.1991	25.792	1.62072	58.1045	3.65117	5.67582	0.356657	0.0527983	0.00331774	39.7571	2.49826	5.13421	5.13421	0.532663	5.18299	0.0305223	86.7985	52.761	1.2402	1.37837	19.0394	38.6403	0.909744	24.2705	2.28613	53.6012	20.9283	42.4738	10.6164	23.4463	87.6095	98.8459	82.195	45.7174	11.9099	18.8196	19.9491	9.56787	1.26441	0	5.4479	11.4017	18.2643	0	1.32223	2.38618
P010-S109-R01	5.57968	6.05207	6.99595	5.50976	10.0806	0.477741	22.1828	1.05129	6.62478	0.313963	39.4072	1.86759	57.7653	2.73762	3.07568	3.07568	0.470137	1.55157	0.054015	90.7649	82.7011	5.75176	1.13615	18.8775	23.5383	0.607311	5.26134	1.0612	30.0714	31.0838	38.7583	4.95794	28.3373	90.3449	97.5923	42.967	71.8431	32.3974	18.423	2.26064	22.3316	1.60624	0.516828	26.1194	8.88804	18.9825	0.0975645	1.37423	2.76274
P011-S110-R01	7.51892	4.58313	7.36747	3.94061	20.2733	1.00103	38.7945	1.91554	9.32189	0.460283	21.202	1.04688	53.1453	2.62413	7.98566	7.98566	1.51676	6.82497	0.316335	85.455	59.2666	1.63784	0.588858	22.0636	39.9606	1.0212	23.984	3.12357	59.3335	21.6055	39.1309	7.67841	18.9955	72.6996	99.7189	17.4069	69.5473	7.96372	22.0016	4.17487	15.0261	0.611488	0.0887662	39.1644	14.0303	38.3732	0.019585	9.39319	3.03133
P012-S111-R01	8.71278	5.23145	8.38461	4.54927	31.8918	2.52077	63.4453	5.0148	6.16091	0.486966	0	0	23.2182	1.8352	8.62995	8.62995	0.217114	1.95364	0.0335483	81.1323	54.4348	1.32873	1.87685	4.0522	8.91778	0.143204	23.5165	2.02364	45.5804	28.2967	62.2733	11.6209	22.524	97.1444	90.1695	5.25701	47.0874	5.67376	3.65385	1.23626	13.3242	0.659341	2.0339	5.89953	13.5437	15.3664	0.0824176	1.38736	3.83242
P013-S112-R01	7.8478	4.93469	10.0473	2.99237	20.3064	0.815894	25.9452	1.04246	24.7392	0.994002	0	0	89.146	3.58181	3.42082	3.42082	1.34944	5.66589	0.0525063	71.6155	51.0038	1.37091	0.981082	4.98248	10.6505	0.143381	10.5807	0.650424	25.8606	34.75	74.2814	16.2674	39.7596	47.0231	97.9403	53.5786	54.8676	34.3702	4.87986	5.66899	19.0665	5.59114	0.0710227	22.3746	12.9226	12.5952	0.0035387	2.36739	4.4906
P014-S113-R01	3.64938	10.5657	15.9247	9.70166	47.0979	1.56441	35.0805	1.16524	4.34671	0.144381	26.8985	0.893464	26.8729	0.892614	4.87588	4.87588	0.869091	3.87204	0.0936955	91.1875	58.1697	1.73825	0.280405	16.013	33.369	0.739483	28.6521	5.35241	66.4707	21.6543	45.1248	5.35312	12.4188	91.0213	99.4415	22.9493	56.4862	24.1027	15.9235	6.57546	12.2317	1.29025	0.0724038	2.84988	14.938	7.42574	0.011594	0.81655	3.23473
P017-S116-R01	8.76405	6.34019	8.2342	4.912	26.9848	2.30342	39.5183	3.37327	0	0	0.0297354	0.0025382	56.6087	4.8321	7.80895	7.80895	2.59508	10.1826	0.564915	78.2091	73.9453	3.10915	0.857389	18.4173	26.5808	0.475973	14.2399	2.63788	50.0686	38.694	55.8452	5.39823	18.9806	95.1829	96.4679	32.6024	72.3752	17.132	17.7668	4.64254	28.0049	0.924822	2.16048	10.7279	15.2232	26.5113	0.397901	1.52764	5.89045
P017-S141-R01	11.3327	6.03855	8.37052	4.67772	28.5946	3.2846	39.7934	4.57099	0	0	0.0101256	0.0011631	57.7562	6.63433	4.43865	4.43865	1.93508	10.7177	0.335506	77.2595	69.2096	2.48585	0.701799	13.6614	20.3898	0.324505	13.7949	1.9564	45.6839	42.0991	62.8334	7.05115	23.351	96.6671	96.1667	25.6307	68.9178	15.1653	13.1377	3.53571	29.0138	1.06933	2.5102	9.06196	17.2666	38.2367	0.342929	1.25008	7.26907
P020-S119-R01	6.40056	0.721174	5.29087	0.651449	3.40203	0.129244	20.7066	0.786648	10.5986	0.402645	22.4239	0.851891	89.843	3.41316	0.402692	0.402692	0.0278333	0.0979958	0.0141073	90.5583	13.7346	0.166957	0.472493	0.0146307	0.113179	0.00115215	4.64281	0.0797543	5.65438	12.6986	98.2331	58.2139	70.8976	66.9924	61.1111	1.27801	50.6305	0.728847	0.00894098	0.0593356	6.42938	0.42429	0	41.0014	26.4162	31.9226	0	1.90362	3.35449
P021-S096-R01	45.1249	2.90844	11.25	1.62273	6.04012	2.5264	31.0445	12.985	36.8875	15.4289	0.0423407	0.0177098	88.3081	36.9366	2.91917	2.91917	0.0453831	0.176441	0.119478	54.7034	24.4769	0.598319	0.803383	3.37616	14.9394	0.223745	4.49551	0.233894	10.7062	15.0893	66.7696	19.2203	45.7736	93.8556	27.6417	3.16274	12.9519	0.511096	0.933226	0.142181	1.95435	0.0982344	0.153139	28.1196	12.6606	27.2226	0.00517023	1.26412	1.9104
P021-S120-R01	43.3703	2.5337	12.2368	1.40139	5.6019	2.31014	30.2418	12.4713	36.1696	14.9158	0.0195529	0.00806332	89.0211	36.711	5.79507	5.79507	0.0489836	0.232218	0.0246959	55.1389	19.797	0.496567	0.532942	1.72127	10.0283	0.142236	3.4385	0.177133	8.17289	12.1016	70.505	19.4119	46.1398	96.4756	95.5294	17.3145	48.2597	0.438139	1.64432	0.595359	5.84018	0.0850512	1.88235	33.5689	28.8487	35.8022	0.0324005	1.15427	3.49115
P022-S121-R01	6.34763	0.899151	6.44471	0.830868	90.9194	4.79283	19.2495	1.01474	22.3009	1.17559	0.0133538	0.000703948	66.7958	3.52115	20.8045	20.8045	0	0	0.00467904	91.4829	13.5665	0.166123	1.88025	0.357483	3.15633	0.0412608	19.9239	0.621132	24.0303	8.66397	76.4969	32.0768	38.688	93.641	71.2446	9.25612	44.6255	0.521356	0.254687	1.84418	3.86634	0.167234	14.1631	21.3076	15.6189	58.4111	0.0506306	4.2453	1.35322
P026-S082-R01	12.7225	8.94675	12.3352	6.02585	4.15315	0.35407	14.8605	1.26691	14.2278	1.21297	27.6606	2.35816	81.2135	6.92374	10.5543	10.5543	3.13169	18.9098	0.105205	65.9303	72.5938	3.23602	0.553131	13.2532	18.3662	0.276646	9.52381	1.83236	41.9658	47.9066	66.3889	5.19758	22.9027	75.358	99.0796	77.6304	66.3514	13.9983	13.1312	7.39337	31.7867	0.727574	0.197239	12.9918	20.2164	35.2054	0.0261404	1.23731	9.68501
P026-S126-R01	13.9833	9.9118	14.3731	6.0185	4.68899	0.51568	15.9787	1.75729	17.2056	1.89222	27.8676	3.06479	78.5714	8.64103	11.106	11.106	4.33593	20.5612	0.0375648	60.4806	67.372	2.62982	0.487844	21.7534	34.126	0.666667	17.5288	5.89317	62.4304	32.6301	51.189	2.97442	10.5937	81.0005	99.4253	44.3685	59.3072	27.1454	21.6284	7.77726	19.352	0.807418	0.287356	31.9465	18.5983	26.4448	0.0625098	5.59983	6.06866
P026-S240-R01	15.0593	9.84147	14.0402	5.40374	4.99672	0.661901	15.318	2.02913	15.3967	2.03956	28.059	3.71689	79.3639	10.5131	9.4447	9.4447	4.51964	23.5208	0.032444	53.9578	65.0852	2.42759	0.52847	16.6604	28.6849	0.508438	16.8517	3.03141	51.7294	32.7679	56.4178	5.55902	17.0645	89.5892	98.8271	47.471	59.0534	17.9506	16.465	7.99967	19.3505	0.99788	0.27452	29.8791	19.0077	24.4577	0.0457361	5.03513	6.22843
P034-S144-R01	12.9872	6.87862	13.2871	5.10762	1.14065	0.134014	26.2662	3.08598	4.30568	0.505868	0	0	42.94	5.04496	3.24521	3.24521	2.48383	8.53519	0.0220707	73.9555	48.6603	1.28716	0.777485	12.3314	28.1649	0.499202	15.4733	1.01431	40.3885	24.7022	56.4198	15.2551	39.8188	91.532	98.5374	80.3899	45.4228	14.8833	12.151	12.439	11.2204	2.27045	0.110619	4.37849	25.6412	10.4521	0.0136409	0.677499	6.33393
P045-S078-R01	8.05975	8.41689	10.8758	7.17906	41.8127	2.97318	35.2045	2.50328	8.26622	0.587786	0.0157903	0.0011228	27.0409	1.9228	11.7334	11.7334	1.46878	5.50302	0.0550871	84.2936	77.4408	4.35181	1.0104	8.57392	11.5531	0.179684	7.70273	1.04088	37.2107	47.7168	64.2971	7.40024	35.7494	93.928	98.617	77.4427	50.7912	20.8306	8.45534	5.9652	24.2359	1.54151	0.112899	4.93245	9.70687	11.4454	0.00967984	0.379934	4.6318
P045-S195-R01	6.31119	7.1288	9.04182	5.53826	36.8504	2.14094	31.5486	1.83291	5.48031	0.318396	0.0209974	0.00121991	31.0026	1.80119	0.042882	0.042882	8.24797	14.8535	0.148217	76.2014	78.2728	4.65166	0.90081	9.20796	11.9853	0.205487	7.25293	1.16575	39.924	44.8105	58.3262	6.22166	34.2474	91.2536	98.7934	88.4126	58.2589	31.0916	9.09686	6.41251	26.1061	1.93441	0.0875742	3.29833	3.66705	9.61982	0.00806379	0.239226	1.64322
P049-S254-R01	31.3648	4.09404	9.91546	2.57911	6.33641	1.78454	34.4276	9.69594	5.23031	1.47303	41.9136	11.8042	56.451	15.8984	6.18344	6.18344	0	0	0.00136519	64.5829	41.2498	0.78208	2.0251	8.00634	20.644	0.310281	14.4152	0.909964	26.4065	25.8035	66.5332	15.8415	29.0193	91.8187	97.3872	34.9604	47.8811	7.96319	7.79715	5.03962	12.355	1.26149	1.86065	28.3201	22.6139	47.599	0.14897	4.08241	5.83518
P060-S074-R01	33.6437	9.97928	14.302	6.00865	38.4993	12.6267	41.4324	13.5887	0.0087558	0.00287167	0.0350232	0.0114867	25.4181	8.33644	6.01392	6.01392	0.483405	6.81447	0.0577258	59.9363	67.8148	2.33432	1.66479	9.97283	14.9613	0.247605	9.28804	0.693025	30.5451	40.2772	60.424	13.4022	44.0751	97.3514	98.2561	36.0445	49.6019	11.6788	9.79891	3.34783	19.9783	1.56522	0.435967	20.8309	23.0468	13.9092	0.0434783	1.93478	9.28261
P062-S077-R01	21.3211	3.96013	4.93614	2.54753	10.3651	2.00317	19.6969	3.80662	7.40559	1.4312	36.615	7.07621	74.8482	14.4652	8.43332	8.43332	3.68899	11.7124	0.442976	63.1753	76.8594	4.64867	0.298472	26.0028	36.0794	0.894936	13.6509	8.78242	67.4748	29.0555	40.3151	1.55435	7.68294	90.5515	98.7855	85.6112	58.8761	54.4669	25.687	11.6867	17.1068	0.846604	0.551249	6.30025	24.3814	22.6225	0.14334	0.860042	7.08415
P064-S081-R01	27.1869	8.63292	11.767	4.66983	26.7731	6.82888	40.6363	10.3649	2.74308	0.699664	55.8864	14.2547	41.1309	10.4911	19.7752	19.7752	2.92287	20.1301	0.382333	53.1225	70.6249	3.1141	0.997792	5.32512	8.29437	0.124001	5.66428	0.386026	20.0802	42.944	66.8893	14.6733	52.0177	97.2384	97.8038	16.5864	63.0447	10.6801	5.20817	0.939498	27.0739	1.56713	0.219619	23.1934	17.4383	21.865	0.011695	1.31374	7.48869
P064-S085-R01	31.0855	3.76637	5.59466	1.91485	26.5412	8.10798	41.0134	12.5291	3.13239	0.956903	55.6659	17.0052	42.86	13.0932	18.3592	18.3592	3.08045	17.9967	0.224509	49.8887	66.4966	2.46551	1.07367	5.56551	8.52512	0.127646	4.76518	0.317416	17.5228	43.601	66.787	15.0124	55.2045	96.5385	19.0119	0.463679	18.2601	2.89452	1.05811	0.0220951	7.9616	0.434537	0.308778	17.6198	1.56532	13.3279	0.0171851	0.839614	0.682493
P065-S087-R01	1.92321	4.39667	5.60563	4.27173	6.33914	0.0858295	38.3518	0.519269	23.2964	0.315424	0	0	80.6656	1.09218	5.35842	5.35842	0.0025195	0.0243038	0.2003	96.804	76.514	4.20941	1.88708	28.3709	37.7854	0.828429	7.30868	1.25784	38.3363	34.2466	45.6109	5.8105	30.4779	75.279	95.0682	42.3515	57.5801	26.326	26.9717	3.09533	19.7193	1.52967	4.09927	6.09418	14.0173	24.5064	1.163	0.445404	4.80047
P067-S089-R01	20.5222	9.49386	10.3396	6.98044	17.3138	3.05989	29.8577	5.2768	14.4457	2.55302	57.2997	10.1267	62.4693	11.0403	3.58669	3.58669	0.37773	2.00713	0.0658442	70.1985	90.8621	12.4624	0.355908	4.01498	4.53833	0.0881144	3.64052	1.51734	38.1818	45.5655	51.5049	2.39928	25.1636	87.3022	76.8566	58.4762	73.1396	41.6185	3.08578	2.12884	33.3264	0.998544	0.863558	8.7619	8.59839	8.95954	0.0346717	0.318979	3.9179
P069-S093-R01	20.8055	4.9884	6.19775	3.55573	41.9009	8.88134	55.6823	11.8025	16.0217	3.39598	0.0678887	0.0143897	28.3639	6.01203	8.43326	8.43326	0.359583	7.09553	0.0982896	70.6381	79.1035	4.19728	1.14653	11.3764	14.5894	0.294283	5.2886	0.87013	26.3909	38.6581	49.5761	6.07795	30.3299	98.6185	28.9679	1.86567	24.9872	4.87013	3.29551	0.098668	9.6596	0.296004	0	13.4328	5.28331	11.3636	0	0.710409	2.04243
P004-S103-R01	12.6887	7.08419	10.3041	5.87143	25.0172	3.11271	38.2818	4.76313	34.0893	4.24149	50.1718	6.24252	34.9141	4.34411	2.87267	2.87267	0.079975	3.28827	0.142291	80.5924	62.7815	2.69187	0.563946	10.6141	18.9336	0.337646	10.7971	1.29197	39.4796	31.4355	56.0754	8.35706	30.5576	96.3842	98.659	51.7891	62.2898	21.1679	10.4717	5.5917	19.5811	1.76901	0.191571	25.6121	10.0259	9.00243	0.0203335	2.76535	3.15169
P004-S127-R01	15.3142	5.25232	7.99777	3.47454	22.2769	3.45222	38.4773	5.96278	27.1647	4.20967	48.4476	7.50786	47.7713	7.40306	21.0073	21.0073	2.48407	16.7295	0.161737	66.3675	62.1252	2.40635	0.55562	13.4385	22.6024	0.429922	12.5586	1.53529	45.2902	31.2579	52.5733	8.17995	29.4995	96.5186	99.1236	71.2762	63.0587	20.2428	13.3207	8.95129	19.7109	1.65585	0.120296	11.0151	8.12708	6.35234	0.0161659	1.38334	2.54036
P015-S114-R01	51.4139	21.283	30.0847	3.16569	16.3584	9.34937	35.2679	20.1567	15.4018	8.80262	0.0318878	0.0182249	78.7946	45.0337	0.153139	0.153139	0.000438983	0.0345483	0.00373136	19.9166	65.6582	2.54944	0.528765	0	0	0	1.26582	0.0571429	3.77358	53.1646	92.3077	22.1519	66.0377	80.7892	112.155	100	10.7143	40	0	1.26582	5.6962	8.86076	2.87086	0	27.381	11.4286	0	0	14.557
P016-S075-R01	3.25287	4.8987	7.91774	3.30559	33.0256	0.757576	43.7949	1.00461	14.8718	0.341144	56.7179	1.30105	35.7949	0.821099	15.5151	15.5151	1.80446	23.3476	0.342147	68.2847	60.1064	1.9112	5.95758	9.10876	15.9322	0.343449	7.63644	1.01832	22.6031	26.5214	46.3889	7.49902	22.1964	75.9569	91.7385	23.8218	50.0617	10.1222	8.35624	1.81913	13.2771	0.759063	0.79023	6.08398	11.8431	10.733	0.0719801	0.464599	3.14095
P016-S091-R01	7.28409	1.78084	4.07621	1.2238	36.7801	2.63986	49.411	3.54643	19.8298	1.42327	53.534	3.84236	33.7696	2.42379	5.08503	5.08503	0.660955	21.9993	0.0960313	67.2003	47.1584	1.27336	9.2994	9.43943	19.8851	0.555667	11.467	2.19218	31.2587	16.9876	35.7861	5.23087	14.2592	92.4405	83.3935	8.32095	27.1815	1.62866	7.87187	0.954166	4.61748	0.0851934	1.08303	1.63447	6.72016	5.21173	0.102232	0.187425	1.14159
P016-S115-R01	0.727746	10.2547	16.173	3.18301	30.1075	0.201251	49.4624	0.330626	15.0538	0.100625	59.1398	0.395314	47.3118	0.316251	4.48916	4.48916	0.362783	35.3018	0.122093	30.0109	68.1815	4.10918	5.63764	16.9643	26.3889	0.77551	7.14286	2.66667	37.2093	21.875	34.0278	2.67857	13.9535	86.4629	94.7368	43.75	59.1837	16.6667	16.0714	3.125	12.9464	0.446429	0	6.25	6.12245	16.6667	0	0.446429	1.33929
P016-S143-R01	5.24439	8.79533	15.8178	5.52107	36.5079	1.74583	62.1315	2.97116	20.8617	0.997614	65.3061	3.12297	35.8277	1.71329	4.56227	4.56227	0.159969	20.2692	0.119075	54.777	59.931	2.67493	7.07508	6.2069	11.465	0.206897	7.58621	1.83333	28.9474	30	55.414	4.13793	15.7895	94.7021	88.8889	9.09091	44.8276	16.6667	5.51724	0.689655	13.4483	0.689655	0	18.1818	13.7931	0	0	1.37931	4.13793
P016-S186-R01	4.56761	11.865	19.7346	9.36358	37.3358	1.30099	65.666	2.28818	23.6398	0.823745	63.7899	2.2228	30.7692	1.07218	1.42857	1.42857	0.248626	12.7973	0.0939328	73.3293	57.4743	1.67405	4.05481	9.27578	18.2713	0.296804	8.27685	0.711656	19.9484	31.2522	61.5601	11.6304	28.031	86.6836	93.4615	8.62069	32.0776	5.21472	8.66928	0.713521	10.025	0.606493	0	3.87931	17.4658	8.28221	0	0.321085	5.45844
P016-S197-R01	4.05306	7.73592	13.6405	6.22408	41.3517	1.67821	65.063	2.64051	31.8442	1.29236	65.7503	2.6684	33.1042	1.3435	6.3765	6.3765	0.230021	7.62332	0.0636362	77.7493	58.8361	1.98864	4.68316	5.47818	10.4332	0.157333	7.66017	0.702128	21.8543	34.8189	66.313	10.9099	31.1258	89.3279	79.661	6.66667	29.2	5.53191	4.36397	0.510678	10.1671	0.603528	2.54237	6.06061	31.3333	18.7234	0.139276	0.464253	10.9099
P016-S210-R01	3.68962	7.22158	12.6396	6.03344	36.8653	1.33579	74.8344	2.71157	24.9448	0.903855	67.7704	2.45561	26.2693	0.951848	2.52823	2.52823	0.176639	10.0569	0.0179414	81.7254	59.7953	1.81518	4.09963	3.90977	6.62139	0.0970149	5.06266	0.372694	15.7321	40.3008	68.2513	13.584	42.2118	91.9335	74.359	9.90099	26.7413	3.69004	2.90727	0.501253	10.7769	0.501253	2.5641	3.9604	20.7711	12.9151	0.100251	0.200501	8.37093
P018-S142-R01	15.9449	10.1529	12.7174	5.98638	13.1183	2.19109	33.4767	5.59148	15.8423	2.64607	50.6093	8.45307	56.6308	9.45881	2.8163	2.8163	0.266648	13.9044	0.0946822	59.268	77.9485	3.76057	0.382252	8.51593	11.1177	0.174376	7.92862	1.65566	35.5263	48.8367	63.757	4.7888	21.4575	94.5497	97.878	17.094	57.4931	11.3208	8.33522	1.35532	28.0777	0.542128	0	1.9943	8.97317	24.0566	0	0.158121	4.3822
P018-S187-R01	23.7737	7.67082	10.4848	5.12245	19.3172	4.49108	46.1501	10.7295	25.1259	5.84154	52.5728	12.2227	48.4956	11.2748	4.85681	4.85681	0.359218	6.05457	0.0622039	67.1543	71.3879	2.63881	0.383692	8.58126	12.9322	0.204633	14.5927	3.59322	45.0425	41.935	63.1973	4.06119	12.5354	97.3699	98.3066	6.81342	58.8729	10.5461	8.43595	0.994264	24.6883	0.428298	0.445633	3.09224	10.87	21.0923	0.0382409	0.451243	4.55832
P018-S196-R01	34.571	10.0589	13.4428	5.70519	18.6399	6.3664	46.5116	15.8859	25.2467	8.62292	55.0035	18.7863	49.1896	16.8006	5.00039	5.00039	0.434855	6.9069	0.164438	57.3269	71.3887	2.66982	0.380112	7.95276	11.8698	0.17317	13.0481	2.41221	41.3721	45.9245	68.5443	5.4092	17.1511	97.6322	97.1963	8.16456	52.6164	15.8779	7.72979	1.06532	24.1638	0.858865	0.934579	5	14.7995	25.9542	0.0743249	0.652407	6.7966
P018-S209-R01	12.2739	5.94137	7.21328	4.6138	16.3723	1.90881	39.1926	4.56937	22.8483	2.66383	50.0841	5.83919	49.986	5.82775	10.8487	10.8487	0.993921	7.18842	0.0705173	76.8439	79.9587	4.22153	0.326068	5.46581	6.98556	0.10341	5.50757	1.28579	26.5017	52.856	67.5524	4.28342	20.6113	94.5255	97.5875	20.7103	56.8274	13.9559	5.33395	1.14063	30.0367	0.597789	0.120627	3.31205	11.21	22.0113	0.00659326	0.182414	5.92514
P023-S086-R01	20.7664	4.87016	9.64667	3.96274	0.0407332	0.00708516	54.2974	9.44452	33.5234	5.83109	0.0814664	0.0141703	79.5927	13.8444	2.73585	2.73585	0.000125784	0.00711592	0.00163519	76.7308	47.3286	1.06317	5.18261	6.05745	13.6909	0.210793	17.2981	1.36007	36.2013	28.7365	64.9494	12.7186	26.6173	89.8253	82.9897	16.787	49.7646	26.7594	5.02706	2.90383	14.3006	3.40341	1.89003	11.2515	28.8301	43.3715	0.114488	1.94629	8.28476
P023-S123-R01	14.0605	2.46931	6.77409	2.17579	0.0391389	0.00488878	52.5636	6.56563	37.7299	4.71278	0	0	81.8395	10.2224	11.3815	11.3815	0.000210276	0.00433445	0.00378497	90.3626	34.1947	0.574193	4.3669	3.61315	12.175	0.185624	17.1066	1.00551	26.586	19.4649	65.5893	17.0128	26.4403	88.9187	83.6327	23.7352	38.9033	21.0682	3.02178	4.06029	7.57248	3.58431	4.19162	23.8617	25.0834	48.156	0.15145	4.08193	4.88245
P023-S180-R01	9.87686	6.21643	14.162	5.27328	0	0	55.9284	5.13508	40.5236	3.72068	0	0	83.5742	7.67339	6.85664	6.85664	0.00138853	0.009349	0.0117254	86.0124	43.2178	0.867818	4.40063	4.5583	10.6496	0.143632	15.5609	1.10258	31.2689	31.7359	74.1447	14.1132	28.3597	88.9468	4.42939	0.839566	18.304	14.5586	0.201905	0.130644	5.80893	2.05468	2.26681	23.7903	13.8618	13.4646	0.103328	3.70199	4.39915
P023-S192-R01	6.24453	4.36263	12.2701	4.04221	0.0132398	0.000705696	53.8991	2.87289	38.1835	2.03523	0.0132398	0.000705696	82.7089	4.40849	6.75372	6.75372	0.00111921	0.00437331	0.00969983	92.7239	33.2613	0.545892	3.09454	2.15701	7.04845	0.0918322	20.9416	1.01902	32.8763	23.4886	76.7536	20.5508	32.2628	87.749	86.2159	9.73451	41.8888	25.1206	1.85969	2.03856	9.83909	5.16248	3.13784	18.5648	22.8088	34.4678	0.0676835	3.88777	5.35747
P024-S084-R01	22.689	5.71624	8.8181	2.5078	21.6065	4.75256	60.7475	13.362	46.7181	10.2761	55.8014	12.274	30.5876	6.72802	9.29309	9.29309	4.68721	31.4648	0.356241	44.545	64.4952	2.24384	1.72809	9.08876	14.0885	0.211096	9.36007	1.12235	32.8571	43.0551	66.7398	8.33972	29.2754	98.0671	14.6658	0.693132	15.7808	6.50636	1.33294	0.0648776	6.79446	0.542613	0.129786	5.22999	6.87671	5.02122	0.0117959	0.489531	2.96078
P024-S098-R01	34.9713	8.14267	11.5668	4.06482	23.8036	8.439	67.4465	23.9116	47.6419	16.8903	60.175	21.3337	28.9468	10.2624	10.1678	10.1678	3.44249	13.89	0.156309	48.933	70.1708	2.93397	0.784638	3.78623	5.46712	0.0633872	6.71992	0.941119	27.9891	59.7319	86.2496	7.14035	29.7402	99.1725	98.2727	31.2826	43.1353	18.7112	3.72083	2.10217	25.7655	1.33604	0.616903	13.9381	23.4075	24.2067	0.0233574	0.936631	13.9817
P024-S124-R01	19.2024	12.1187	16.0587	4.97098	25.7113	4.97266	68.5634	13.2604	47.2076	9.13012	61.5911	11.912	31.2083	6.0358	12.1944	12.1944	2.06868	33.9446	0.412832	40.7431	76.5001	4.09506	0.838676	7.20147	9.41537	0.127031	7.36895	1.40127	40.9302	56.6907	74.1187	5.25875	29.2093	98.5141	99.7674	69.0909	57.548	26.4331	7.18473	5.09127	32.6244	1.39005	0	9.09091	17.0458	11.465	0	0.669905	9.66337
P024-S147-R01	8.28673	9.37392	12.6227	4.22054	24.9899	1.96035	70.9794	5.56803	48.69	3.81952	57.5574	4.51513	31.9226	2.50419	12.5085	12.5085	1.80626	46.1543	0.0462773	40.9692	75.2683	3.92374	0.406593	9.91492	13.7727	0.198949	8.67147	0.970696	40.2124	49.8364	69.2273	8.93325	41.4264	98.8375	99.67	80.7547	59.9475	16.8498	9.8822	7.00262	29.8757	1.50524	0	3.77358	13.7886	24.9084	0	0.327225	6.87173
P024-S191-R01	11.0416	1.98696	3.54913	0.876343	24.0628	2.71623	66.3962	7.49485	47.1114	5.31797	58.831	6.64089	32.7098	3.6923	15.0247	15.0247	9.71583	43.3644	0.0372906	41.2671	54.1644	1.81936	0.615576	10.834	22.5343	0.372416	8.94125	0.836716	30.0929	29.0911	60.5085	10.6861	35.9655	98.9852	98.4531	39.2503	27.2789	4.24354	10.6664	3.50946	7.93573	0.45347	0.363967	8.59978	5.79465	14.9446	0.0394322	0.768927	1.68573
P025-S099-R01	10.1933	5.65073	8.84382	3.53573	29.8824	2.85918	47.1322	4.50966	19.0278	1.8206	50.3728	4.81972	34.643	3.31467	25.8948	25.8948	2.59483	18.586	0.782632	61.1392	56.8933	1.46013	1.04775	4.22105	8.37115	0.108308	27.1656	2.9814	59.0566	38.9727	77.2903	9.11171	19.8084	94.3008	98.7952	5.14821	56.8291	25.3953	4.1702	1.39854	22.1478	2.31395	0.200803	3.30733	12.8317	15.907	0.00847601	0.898457	5.00085
P025-S125-R01	9.69178	5.85688	12.2413	2.06963	32.3703	2.95707	49.4661	4.5188	19.1559	1.74992	39.6307	3.62032	35.3599	3.23017	26.0073	26.0073	5.22571	52.4004	0.515573	34.627	42.5313	0.798618	0.459181	3.86484	10.6854	0.144421	41.263	4.49494	68.3955	26.761	73.9878	9.17988	15.2161	97.619	96.1183	3.87812	54.6716	11.1284	3.71482	1.60023	14.6307	1.02157	0.554529	1.21191	13.0272	11.9844	0.0214316	0.500071	3.48621
P025-S154-R01	9.32732	6.91581	11.6951	4.12641	30.6406	2.71957	48.9019	4.34038	20.4271	1.81304	50.285	4.46314	40.1626	3.56471	17.5599	17.5599	6.47174	31.0436	0.206894	58.5634	54.6827	1.31207	0.419325	3.31958	7.34344	0.0939737	29.0685	2.32274	56.4084	35.3246	78.1435	12.5147	24.2853	95.9241	98.0769	4.95819	60.5199	18.1283	3.25575	1.44127	21.3784	2.26871	0.295858	1.51195	12.3862	16.9119	0.00982125	0.439501	4.37537
P027-S083-R01	21.0933	7.7415	10.6883	4.33423	12.4116	2.40789	66.7083	12.9416	11.7711	2.28362	59.1465	11.4746	13.2768	2.57573	9.12217	9.12217	0.809374	13.702	0.22291	56.9685	71.8299	2.82294	0.895571	16.8133	23.893	0.426221	11.2089	1.16579	41.573	39.4475	56.0578	9.61483	35.6608	97.3111	91.5487	67.7606	55.1289	13.9535	15.3924	7.59521	21.747	1.3416	0.2145	2.1879	14.5913	19.6549	0.0360646	0.245239	5.75591
P027-S094-R01	5.16091	6.16164	8.80265	4.24083	11.9028	0.560622	67.3093	3.17028	12.3219	0.580362	55.8256	2.6294	14.5013	0.683012	2.66185	2.66185	0.885821	21.4743	0.183107	66.6837	69.7348	2.44509	0.516196	15.7564	22.4267	0.44097	13.3333	1.3209	47.3896	35.7313	50.8578	10.0942	35.8768	92.2492	2.15139	2.91902	6.81658	3.85572	0.338983	0.389203	2.43566	0.389203	0	0.094162	2.8461	7.46269	0	0.0125549	1.01695
P027-S128-R01	15.4524	5.88223	11.4334	3.7905	13.9527	2.1062	67.9675	10.2599	13.5037	2.03842	59.5061	8.98261	11.9841	1.80903	7.92159	7.92159	0.611345	10.0915	0.126465	62.7562	52.8355	1.23655	0.570783	7.12732	13.2461	0.193269	7.99744	0.318715	19.5557	36.8778	68.5375	25.0928	61.3579	97.7068	93.5368	48.8	44.8647	14.5844	6.66667	3.90275	16.5451	3.65963	0	6.88	12.1443	20.9077	0	0.550224	4.47857
P032-S188-R01	5.9858	3.79217	7.58517	3.3402	4.67051	0.0889365	9.85285	0.18762	0.0639795	0.00121831	0.895713	0.0170563	60.4607	1.1513	2.84463	2.84463	0.304729	1.89012	0.325985	88.4951	49.0689	1.15255	4.84573	6.74164	14.3241	0.18562	26.7042	2.01879	60.4057	36.3196	77.1688	13.2278	29.9218	31.3112	38.6944	0.722641	33.3244	12.1746	2.60864	0.192975	12.1033	1.61044	0.0205931	9.86743	21.1727	18.5873	0.00138831	2.63501	7.68985
P032-S194-R01	3.72624	4.55157	14.8485	4.19296	4.28266	0.0949397	9.74304	0.215988	0	0	0	0	56.8522	1.26032	1.02936	1.02936	0.0994539	1.31456	0.0119507	93.1275	30.1187	0.515946	2.96438	4.93121	19.2337	0.277481	43.2813	3.69262	69.8604	17.7713	69.3153	11.721	18.9189	59.0585	98.1324	13.1665	36.9818	12.9762	4.83911	5.69866	6.57215	1.52094	0.282965	5.36463	35.5057	35.6905	0.0139536	2.32188	6.30983
P059-S073-R01	12.0784	8.851	14.7223	6.71458	39.681	4.30985	39.0994	4.24668	0	0	0.166168	0.0180479	36.9059	4.00845	18.7389	18.7389	1.27903	11.2102	0.0744326	75.1703	59.2265	1.61259	1.25886	3.84643	6.6509	0.0820134	4.78976	0.211232	12.6479	46.9	81.0953	22.6753	59.8767	90.9336	96.4439	73.1167	54.6538	48.4555	3.70964	3.50211	25.6326	10.9874	0.122624	13.5401	17.881	16.1622	0.00471665	0.648539	8.3862
P059-S090-R01	9.99611	8.72076	14.0186	6.48979	41.4193	3.54512	48.5699	4.15714	0	0	0.0269833	0.00230952	40.7987	3.492	12.6463	12.6463	0.913561	9.80212	0.199561	72.9449	60.5167	1.69571	1.57336	4.4507	7.58989	0.0974657	4.30802	0.193382	11.5712	45.6642	77.8724	22.2773	59.8361	91.1575	91.1843	71.8491	52.6211	44.3515	4.05834	3.09528	24.029	9.88031	0.445236	8.83165	14.9887	21.6332	0.0198161	0.380469	6.84448
P061-S076-R01	8.63164	6.57516	9.98965	4.11794	48.3958	4.00021	28.8385	2.38368	35.6823	2.94936	12.8698	1.06377	29.0469	2.4009	18.0362	18.0362	13.5727	27.8588	0.973737	60.5464	64.2377	2.20289	0.764922	16.04	26.1148	0.631785	15.8766	2.18545	50.6039	25.3883	41.335	7.26469	23.1549	97.6204	87.2547	44.739	56.5042	14.4825	13.9956	7.10302	14.3455	1.05211	0.773251	11.5511	15.5925	13.1873	0.124029	1.83392	3.95867
P063-S080-R01	15.8114	8.44408	11.3336	5.08788	26.8859	4.27956	39.8066	6.33621	33.5783	5.34483	61.9729	9.86453	39.5745	6.29926	5.73727	5.73727	0.528571	22.6944	0.12517	60.2978	73.5081	3.24054	0.928527	4.97612	6.98906	0.0897145	8.67052	1.18151	35.1324	55.4662	77.9033	7.33853	29.7352	96.685	35.3535	6.08696	30.8564	12.3288	1.75924	0.527771	17.1149	0.90475	14.6465	11.3043	7.56683	3.42466	0.728826	0.980146	4.19703
P063-S079-R01	4.07873	7.11304	8.74994	4.88153	25.7263	1.00315	38.5895	1.50473	31.7948	1.23978	58.8332	2.29409	43.2755	1.68745	19.2512	19.2512	3.79783	20.0386	1.09437	68.2887	78.5709	4.35301	0.76357	6.62877	8.95658	0.120829	8.34377	1.11959	37.5054	54.8608	74.1261	7.45255	33.4994	96.8686	91.8605	52.7714	66.1661	51.2605	6.08922	4.40312	36.2993	3.82021	5.23256	10.97	9.6066	15.2553	0.346854	0.91531	5.27026
P063-S097-R01	18.3487	5.0554	7.16682	3.30627	27.6306	4.43413	27.4546	4.4059	0.0989555	0.0158803	0.0439802	0.00705791	57.0533	9.15587	10.6046	10.6046	1.67602	13.4024	0.233206	65.6575	68.1013	2.61663	2.27063	6.57583	10.2546	0.153525	9.28426	0.775772	30.6416	42.8322	66.7941	11.9678	39.4982	88.6697	97.9785	8.72483	46.7947	10.1354	6.4429	0.810036	20.0432	1.21298	0.568541	6.75615	12.7437	9.05935	0.0373863	0.627259	5.4584
P074-S268-R01	3.88706	1.11727	5.10706	1.05614	10.5172	0.442812	80.4828	3.3886	15.7931	0.664944	42.931	1.80754	17.069	0.718662	2.75079	2.75079	0.000480507	0.00391099	0.00936989	93.8563	22.0145	0.290234	1.44214	1.82274	8.97532	0.124031	16.4654	1.88031	21.1801	14.6958	72.3635	8.75674	11.2642	98.5705	92.9167	2.62915	24.3928	4.94363	1.69363	0.4329	3.58472	0.4329	5	60.9317	37.0543	35.5594	0.0911369	10.0327	5.44543
P094-S267-R01	9.36448	6.59328	8.47376	5.04778	27.5492	3.96601	31.3775	4.51713	47.6923	6.86583	32.9517	4.74375	51.4848	7.4118	10.7165	10.7165	0.552181	12.3787	0.130913	46.6892	66.5322	2.78129	1.94943	20.2505	39.5918	1.2125	14.6138	1.84211	40.9357	16.7015	32.6531	7.93319	22.2222	90.3922	95.8763	21.4286	53.75	23.6842	19.4154	3.13152	8.97704	1.87891	0	31.4286	17.5	44.7368	0	4.5929	2.92276
P099-S262-R01	45.6705	4.16251	7.92187	1.25884	0.370714	0.114728	1.73772	0.537789	0.139018	0.0430231	0.0231696	0.00717051	84.2447	26.072	0	0	0.0038131	0.166284	0.00635517	31.1172	49.7906	1.2485	2.9007	3.29855	6.9209	0.0852174	7.10199	0.332808	17.5541	38.7075	81.2147	21.3396	52.7454	78.1637	91.8367	21.8009	47.913	52.5237	3.02928	1.5483	18.5459	11.2083	2.04082	28.436	4.08696	7.41325	0.0673174	2.01952	1.58196
P001-S100-R01	17.5666	3.45733	7.42029	2.58145	15.1086	2.46323	20.7319	3.38001	22.9341	3.73905	41.1981	6.71671	75.2198	12.2634	9.33017	9.33017	2.45557	6.6648	0.04669	73.7922	43.4622	1.01099	0.704507	16.6053	41.2209	1.1953	25.4079	3.50239	54.8015	13.8922	34.4859	7.25445	15.6469	93.8791	98.6335	75.0032	37.3163	15.5492	16.3784	19.0568	5.18408	1.12801	0.156914	10.9046	18.2401	21.1015	0.0260561	2.77063	2.53395
P002-S101-R01	18.7266	7.26164	9.54721	5.44136	30.2959	5.42425	38.8858	6.96221	31.6728	5.67078	43.5461	7.79661	49.0538	8.78272	10.3636	10.3636	1.9626	7.17577	0.0254781	73.6113	73.492	3.05264	0.598658	18.2615	25.7057	0.672419	12.9857	2.49431	49.0329	27.1579	38.2287	5.20612	19.6579	94.401	98.4066	40.7889	55.495	32.9317	17.9705	5.29672	15.0713	1.71446	0.143116	26.6738	10.7846	12.5167	0.0261351	3.46378	2.92888
P003-S102-R01	25.6741	6.54843	11.3604	4.21361	38.2875	9.4937	33.6598	8.34623	32.2386	7.99384	0.00597122	0.00148062	37.1589	9.21387	14.3734	14.3734	1.47851	5.92527	0.00609382	64.2805	53.7077	1.38693	0.40264	19.6974	40.6235	1.11649	25.1508	3.49307	56.8538	17.6423	36.3851	7.20019	16.2762	95.849	99.2893	67.3575	54.7987	6.78387	19.5574	16.9409	9.66776	0.488451	0.113404	14.1453	15.6242	31.5408	0.0223377	3.55765	2.75647
P005-S104-R01	12.884	3.59725	7.16156	2.80405	64.3465	5.45326	22.4315	1.90104	7.2315	0.612858	34.7906	2.94845	51.3764	4.35407	8.57379	8.57379	3.22733	10.678	0.198621	80.1162	48.0909	1.35212	0.43008	12.3968	26.7531	0.526935	12.5542	0.780181	34.1486	23.5262	50.7713	16.0913	43.7702	71.0925	76.4666	28.6227	59.1855	4.2137	9.47941	3.59334	13.9241	0.678041	0.0167776	7.31721	8.17469	23.0332	0.00207988	0.918614	1.9232
P006-S105-R01	15.4744	3.2089	7.86706	2.43737	16.3712	2.53708	35.7982	5.54774	26.0144	4.03152	0.00720721	0.00111692	32.1405	4.9809	3.00143	3.00143	1.97844	6.20836	0.0399563	73.8342	38.6896	0.805321	1.43695	9.90882	27.2655	0.59422	30.2863	5.83231	59.9766	16.6753	45.8845	5.19286	10.2835	93.2419	72.5053	16.9346	46.0759	11.3593	7.18442	5.12887	7.68331	0.58987	4.47987	23.342	11.8233	10.3389	0.443902	7.06944	1.97157
P007-S106-R01	14.9844	4.67411	8.06428	3.61498	8.89109	1.22114	46.8966	6.44097	0.0148846	0.00204432	0	0	48.6777	6.68561	8.43036	8.43036	2.3624	6.59979	0.0255241	75.6617	52.3859	1.20862	0.390056	6.17618	13.3323	0.222707	9.80638	0.414888	19.953	27.7323	59.8647	23.6362	48.0925	89.059	58.8005	4.70725	47.0845	4.32188	3.63162	0.461611	13.0576	1.02153	0.276817	22.2432	6.63242	5.63593	0.0170967	2.18125	1.83932
P097-S265-R01	29.853	9.50347	13.8575	5.89117	4.56325	1.34658	98.6012	29.0964	0.712814	0.210346	2.64318	0.779982	1.76967	0.522217	8.1495	8.1495	1.1326	4.4869	0.0389926	62.5772	68.7492	2.49292	0.639094	7.70924	12.121	0.165473	12.2311	1.00155	37.9042	46.5891	73.2505	12.2122	37.8456	99.7297	94.0147	34.4361	66.4584	36.3302	7.24782	4.21192	30.9624	4.43671	3.95948	10.8725	6.79567	12.8657	0.305246	1.32983	3.16604
P098-S263-R01	7.97112	5.4273	9.63748	4.09217	50.8953	3.46078	32.0295	2.17795	25.5437	1.73692	0.0307385	0.00209016	26.6042	1.80903	11.8155	11.8155	4.04562	11.949	0.0465125	75.5141	54.226	1.35695	2.12122	9.716	18.9026	0.279947	22.7049	2.41836	53.1231	34.7066	67.5222	9.38853	21.9666	85.769	99.3801	69.6784	32.8372	15.9467	9.65578	15.8204	11.3967	1.49716	0.0968523	1.93551	14.3485	8.11867	0.00941017	0.439455	4.97986
P100-S266-R01	17.8385	12.9417	17.2067	5.58054	22.1862	3.87823	32.9415	5.63888	15.3682	2.83854	9.86024	3.32794	56.7799	9.50283	5.86633	5.86633	6.17335	14.189	0.0388023	43.1207	72.1398	3.16825	1.0497	28.7099	42.001	1.06317	10.0455	1.55907	38.0156	27.004	39.5055	6.44328	24.3836	94.2444	97.0913	59.8459	61.8594	42.5678	27.8748	6.01181	16.7045	2.74276	0.363592	17.3363	5.70499	10.4901	0.104387	1.74152	1.54058
[truncated: 93 more columns]
