# Supplementary material for: Profiling of immune dysfunction in COVID-19 patients allows early prediction of disease progression
Source: Life Sci Alliance. 2020 Dec 24;4(2):e202000955. doi: 10.26508/lsa.202000955 (PMC7768198; doi:10.26508/lsa.202000955)
Supplement: Supplementary file 6 [file LSA-2020-00955_TableS6.xlsx]

## Sheet: Immune populations
sample_name	PMN-MDSC/LY	M-MDSC/LY	I-MDSC/LY	CD127_dim_CD25_Br/LY	CD19+CD20+/LY	CD19+CD20-/LY	IgG/LY	IgM/LY	CD185+/LY	ICOS_Br_PD-1_Br_CD185+/LY	ICOS_Br_PD-1_Br/LY	CD158e/LY	CD158b/LY	CD158a/LY	CD158i/LY	KIR-/LY	CD159a_(NKG2a)/LY	CTLA-4+_CD4+/CD3+	TIGIT+_CD4+/CD3+	Tim-3+_CD4+/CD3+	VISTA+_CD4+/CD3+	PD-1+_CD4+/CD3+	Lag-3+_CD4+/CD3+	CTLA-4+_CD8+/CD3+	TIGIT+_CD8+/CD3+	Tim-3+_CD8+/CD3+	VISTA+_CD8+/CD3+	PD-1+_CD8+/CD3+	Lag-3+_CD8+/CD3+	CD45RA+_CD4+/CD3+	CD45RO+_CD4+/CD3+	CD45RA+_CD8+/CD3+	CD45RO+_CD8+/CD3+	CD62L+_CD197-__CD45RA+_CD4+/CD3+	CD62L+_CD197+__CD45RA+_CD4+/CD3+	CD62L-_CD197-__CD45RA+_CD4+/CD3+	CD62L-_CD197+__CD45RA+_CD4+/CD3+	CD62L+_CD95-__CD45RA+_CD4+/CD3+	CD62L+_CD95+__CD45RA+_CD4+/CD3+	CD62L-_CD95-__CD45RA+_CD4+/CD3+	CD62L-_CD95+__CD45RA+_CD4+/CD3+	CD62L+_CD197-__CD45RO+_CD4+/CD3+	CD62L+_CD197+__CD45RO+_CD4+/CD3+	CD62L-_CD197-__CD45RO+_CD4+/CD3+	CD62L-_CD197+__CD45RO+_CD4+/CD3+	CD62L+_CD95-__CD45RO+_CD4+/CD3+	CD62L+_CD95+__CD45RO+_CD4+/CD3+	CD62L-_CD95-__CD45RO+_CD4+/CD3+	CD62L-_CD95+__CD45RO+_CD4+/CD3+
P004-S103-R01	317	1578	1055	8	4	8	0	0	4	0	2	6	7	4	9	2	6	0	6	0	2	13	0	0	5	0	5	11	0	13	38	13	10	0	12	0	0	12	0	0	0	3	24	4	6	0	25	0	12
P004-S127-R01	352	2303	654	35	173	11	16	55	211	2	35	42	60	34	75	29	74	1	5	1	12	65	0	0	28	1	24	74	0	89	208	83	54	0	89	0	0	87	1	0	0	16	131	26	33	0	147	0	60
P008-S107-R01	66	762	3125	56	304	13	14	84	288	2	7	63	106	85	210	40	55	1	87	0	57	446	0	0	244	0	74	339	0	166	591	240	334	0	162	0	2	158	3	3	1	67	155	243	125	0	214	0	377
P009-S108-R01	75	21257	2155	83	100	5	11	24	101	0	14	7	72	32	0	38	49	2	59	1	4	181	1	1	66	5	3	220	0	327	360	417	182	0	324	1	2	321	1	4	0	41	164	101	52	3	196	0	160
P010-S109-R01	43	73	5093	84	23	2	1	6	47	0	3	4	16	7	28	33	42	3	96	1	66	211	1	1	109	1	42	112	0	264	435	73	69	1	257	1	3	257	2	2	0	38	312	27	56	3	334	0	96
P011-S110-R01	518	833	3057	66	112	23	5	25	135	7	72	7	32	16	17	34	44	1	66	1	36	261	1	1	325	1	44	174	0	319	313	347	111	0	319	0	0	315	3	0	0	43	217	24	27	0	265	0	47
P012-S111-R01	215	823	2172	31	17	2	0	3	59	0	50	3	34	17	0	14	12	1	13	0	24	67	0	0	87	1	33	97	1	22	159	132	65	0	20	1	0	20	0	1	0	21	75	37	24	0	88	1	69
P013-S112-R01	13	1	1913	16	39	1	2	22	19	0	2	5	5	4	0	12	20	0	20	0	5	55	0	0	39	0	5	41	0	20	140	42	65	0	19	0	0	19	0	0	0	18	77	21	23	3	84	0	51
P015-S114-R01	57	4199	97	0	0	0	0	0	0	0	2	2	6	2	0	8	14	0	0	0	0	2	0	0	0	0	0	0	0	0	3	0	1	0	0	0	0	0	0	0	0	0	0	1	0	0	1	0	1
P016-S075-R01	209	974	275	37	258	48	9	32	173	2	5	3	11	8	14	5	9	1	29	1	22	82	0	1	43	0	14	84	1	69	202	58	57	0	63	4	0	62	1	0	4	24	101	54	22	0	122	0	79
P016-S091-R01	1423	15629	871	7	147	21	44	29	30	0	7	8	21	16	23	8	14	0	1	0	5	33	0	0	10	1	3	36	0	38	69	46	21	0	32	5	0	31	0	0	5	4	18	39	6	0	23	0	45
P016-S115-R01	29838	26143	6973	10	128	43	8	18	15	0	5	0	1	0	1	0	1	0	9	0	1	21	0	0	4	0	0	6	0	17	22	7	2	0	16	0	0	15	0	1	0	1	13	5	2	0	13	0	8
P016-S143-R01	471	6807	3254	7	31	23	0	5	5	0	9	1	3	2	4	0	2	0	5	0	1	20	0	0	3	0	0	3	0	4	21	5	2	0	3	0	0	3	0	0	0	2	9	6	2	0	12	0	8
P016-S186-R01	1993	5852	3151	20	33	12	1	8	3	0	25	1	5	2	4	0	2	0	10	0	2	42	0	0	7	0	1	28	0	15	50	13	18	0	14	0	0	13	0	0	0	8	16	14	11	0	23	0	26
P016-S197-R01	250	781	2577	21	31	8	1	5	22	5	73	4	9	5	9	1	4	0	19	1	9	85	1	0	23	0	2	40	0	14	93	20	29	0	11	1	0	11	0	0	1	29	27	27	9	0	54	0	38
P016-S210-R01	542	1484	167	17	31	3	1	2	7	0	38	2	7	3	6	0	2	0	9	0	2	72	0	0	8	0	1	39	0	9	93	11	31	0	6	1	0	6	0	0	1	19	24	42	6	1	41	0	50
P017-S116-R01	2591	533	2232	86	163	35	3	48	138	3	254	0	59	40	0	70	85	0	166	0	48	374	1	0	87	0	46	133	3	254	535	197	74	5	245	1	1	222	25	1	4	81	387	28	38	2	456	0	75
P017-S141-R01	167	1472	2898	53	125	21	2	23	50	0	21	0	52	37	0	61	75	0	87	0	16	234	0	0	44	1	34	130	0	120	370	121	62	3	115	1	0	103	14	0	1	64	255	26	24	1	308	0	61
P018-S142-R01	3759	27867	3897	25	55	19	1	13	12	1	22	11	23	9	36	23	40	0	13	2	5	45	0	0	10	1	3	28	0	21	123	20	12	0	21	0	0	20	0	0	0	11	70	19	21	0	78	0	43
P018-S187-R01	2300	2762	5319	36	42	7	0	9	35	0	14	42	77	32	88	40	81	0	27	0	8	126	2	0	16	0	5	45	0	41	203	70	19	0	40	0	0	39	1	0	0	22	119	33	27	3	135	0	63
P018-S196-R01	111	2537	2089	25	31	12	0	8	22	0	16	38	71	28	84	34	75	0	19	1	3	73	0	0	11	0	2	31	0	20	118	33	13	0	19	0	0	19	0	0	0	17	62	22	16	0	79	0	38
P018-S209-R01	770	2259	1926	69	114	8	3	23	163	1	12	40	68	28	87	50	87	1	55	0	20	260	0	0	55	0	13	73	0	63	612	63	49	0	61	0	1	60	0	1	0	68	347	106	89	12	385	0	213
P020-S119-R01	98	100	1355	5	0	0	0	0	3	0	23	3	6	1	6	18	27	0	25	1	9	81	0	3	272	3	128	469	3	0	93	34	427	0	0	0	0	0	0	0	0	24	47	17	3	0	66	0	26
P021-S096-R01	948	940	842	24	2	6	0	1	43	2	19	231	194	37	0	289	553	1	27	7	21	93	0	0	23	11	66	202	0	27	123	36	157	0	7	0	19	7	0	19	0	15	16	46	45	0	27	0	96
P021-S120-R01	103	210	1543	29	4	2	0	2	120	6	31	309	258	47	0	402	761	0	39	1	18	101	0	1	29	0	62	189	0	19	138	39	222	0	18	0	0	18	0	0	0	39	66	24	6	0	100	0	37
P022-S121-R01	80	929	300	14	0	0	0	0	363	30	125	20	17	83	0	14	61	0	26	0	13	87	0	1	229	4	254	695	3	5	138	318	512	0	4	0	0	0	4	0	0	21	61	42	12	1	85	2	50
P023-S086-R01	28	1037	165	4	0	0	0	0	2	0	18	6	10	0	0	6	14	0	1	1	0	21	0	0	3	1	0	15	0	4	23	14	10	0	4	0	0	3	0	0	0	6	11	3	1	0	18	0	5
P023-S123-R01	119	4089	1868	12	0	0	0	0	67	5	54	28	39	0	0	26	60	0	4	0	1	82	0	0	34	0	0	172	0	19	104	91	91	0	16	2	0	15	1	0	1	26	40	28	9	0	66	0	37
P023-S180-R01	298	197	4812	60	0	0	0	0	78	2	28	42	59	0	0	34	88	2	41	9	9	273	0	1	76	19	21	195	1	45	313	153	139	1	1	3	38	2	1	37	4	43	57	107	105	0	101	0	212
P023-S192-R01	24	116	2131	33	0	0	0	0	56	0	24	16	23	0	0	15	36	0	4	0	2	135	0	0	132	2	9	221	0	16	180	161	158	0	14	1	0	13	0	0	1	41	75	45	18	0	118	0	61
P024-S084-R01	428	808	751	26	356	27	6	128	99	4	8	109	143	50	131	25	72	1	25	1	17	114	1	0	38	1	15	58	0	43	205	44	39	0	6	0	36	5	0	37	0	14	32	94	64	0	35	0	168
P024-S098-R01	572	5990	1728	79	282	12	11	86	198	6	206	329	466	164	416	52	200	0	70	2	79	395	0	0	57	1	46	109	0	36	570	64	68	0	35	0	0	34	0	0	0	133	246	142	48	0	346	0	223
P024-S124-R01	816	5074	242	30	192	38	15	83	73	3	25	55	80	30	72	8	36	0	29	2	14	86	1	0	8	0	3	14	0	17	140	18	12	0	17	0	0	17	0	0	0	23	80	24	10	0	104	0	35
P024-S147-R01	306	637	866	13	157	4	2	57	39	2	22	11	17	6	14	1	7	0	17	0	11	44	0	0	7	0	2	11	0	12	63	11	11	0	12	0	0	12	0	0	0	8	38	8	7	0	43	0	19
P024-S191-R01	356	2897	1273	17	893	3	62	376	305	3	29	107	152	55	134	18	74	1	27	0	65	202	1	0	78	2	65	128	1	90	243	74	89	0	89	0	1	87	1	2	0	14	66	135	27	0	88	0	155
P025-S099-R01	126	2737	1206	16	90	27	5	49	121	0	2	8	21	13	22	9	15	0	59	0	5	38	0	0	79	0	8	43	0	12	112	78	26	0	12	0	0	11	0	0	0	14	63	17	16	0	75	0	36
P025-S125-R01	1287	8977	305	25	768	75	14	348	326	8	112	21	56	37	45	21	40	0	9	1	2	44	0	0	151	0	2	73	0	16	116	179	39	0	16	0	0	15	1	0	0	15	63	23	14	0	73	0	42
P026-S082-R01	143	470	2253	39	125	4	2	66	69	20	136	7	8	2	15	31	45	0	59	2	84	161	1	0	18	1	41	53	1	57	206	41	22	0	56	0	0	54	1	0	0	41	137	13	13	0	172	0	33
P026-S126-R01	115	1151	3100	45	177	1	2	88	83	4	18	14	13	3	22	44	64	0	41	0	25	107	0	0	15	0	11	62	0	98	147	79	13	0	98	0	0	94	3	0	0	27	87	16	16	0	114	0	33
P026-S240-R01	41	1943	3088	44	194	1	0	111	78	1	7	16	16	5	30	60	87	0	56	0	11	80	0	0	31	0	5	64	0	74	146	75	24	0	73	0	0	2	71	0	0	27	86	13	18	0	113	0	32
P027-S083-R01	1644	8516	3083	20	79	21	3	11	42	1	8	10	59	11	53	4	11	0	30	1	8	88	0	0	21	0	4	29	0	44	103	29	25	0	40	0	3	38	0	4	0	15	57	15	16	0	66	0	37
P027-S094-R01	10586	20115	15702	28	148	30	4	22	17	0	7	3	21	3	17	2	4	0	20	0	18	66	0	0	16	3	10	56	0	70	159	59	45	0	1	0	68	1	0	68	0	4	10	33	110	0	11	1	147
P027-S128-R01	566	3186	625	28	83	17	2	9	59	2	33	15	77	15	67	4	13	0	31	0	12	109	0	0	33	3	11	134	0	33	174	37	118	0	31	0	1	30	0	2	0	21	78	38	36	0	95	0	77
P032-S188-R01	2942	19797	2475	86	47	50	0	26	73	24	1494	0	4	2	0	42	29	8	98	69	73	820	35	8	611	60	82	709	16	154	834	613	303	0	59	0	94	54	3	95	2	176	278	262	116	0	449	0	384
P032-S194-R01	11977	23490	541	55	17	2	0	2	13	1	301	0	2	1	0	25	16	2	102	46	9	239	45	3	577	30	12	510	51	60	218	532	144	0	59	0	0	57	1	1	0	77	80	47	12	0	148	0	69
P034-S144-R01	38	7	309	69	121	1	2	55	44	1	8	6	42	1	0	112	69	0	53	0	31	194	0	0	92	2	58	197	0	124	250	156	154	0	123	0	1	120	2	1	0	64	113	52	20	0	175	0	74
P045-S195-R01	25	53	3641	184	494	8	16	151	1	0	9	10	61	71	0	82	60	2	23	2	89	364	2	0	42	1	40	144	0	234	1140	184	158	0	231	0	2	227	3	3	0	41	664	104	329	34	667	1	436
P049-S254-R01	59	44	4	9	0	0	0	0	23	3	22	5	36	6	44	43	59	0	10	0	2	50	0	1	22	1	6	101	0	19	62	35	38	0	18	0	0	0	18	0	0	14	30	11	6	0	46	0	16
P059-S073-R01	1260	5944	346	41	63	3	0	14	116	0	1	0	26	26	0	28	24	0	19	0	5	77	0	0	14	0	2	45	0	17	219	22	105	0	17	0	0	16	0	0	0	39	119	33	26	0	146	0	72
P059-S090-R01	210	8282	1108	42	63	13	6	23	83	1	30	0	27	23	0	18	22	1	23	1	4	58	0	0	18	2	11	50	0	21	218	20	106	0	19	0	1	18	0	2	0	32	115	28	41	0	152	0	65
P060-S074-R01	1117	1830	1022	31	34	4	0	14	31	0	3	0	70	65	0	67	43	0	29	1	5	65	1	0	26	8	3	33	1	31	125	28	41	0	30	0	0	29	1	0	0	28	62	19	14	0	85	0	39
P061-S076-R01	64	3209	1708	105	692	49	18	226	462	39	166	75	61	102	27	38	61	1	91	1	48	248	1	1	127	0	33	86	1	249	394	246	112	1	217	29	0	214	5	0	29	61	222	55	54	2	281	0	109
P062-S077-R01	23	1685	1014	39	188	22	11	43	131	0	3	22	59	31	110	143	225	1	42	1	12	94	2	0	13	0	3	44	3	256	286	134	15	1	253	0	0	249	4	0	1	69	168	29	18	0	228	0	57
P063-S079-R01	208	996	601	35	167	48	13	23	138	0	3	8	10	7	16	4	12	1	41	0	9	69	1	0	36	0	3	33	1	32	270	41	36	1	29	0	0	29	2	0	0	25	178	23	41	0	213	0	56
P063-S080-R01	0	0	0	12	53	12	4	5	13	0	0	12	14	10	23	6	14	0	4	0	0	13	0	0	2	0	0	9	0	7	78	12	10	1	2	0	3	1	0	3	0	5	24	16	32	0	25	0	53
P063-S097-R01	186	2584	3527	25	108	15	5	20	81	1	3	0	33	33	0	67	70	0	32	0	3	87	0	0	59	0	1	43	0	33	215	46	60	0	32	0	0	31	1	0	0	27	100	57	29	0	118	0	96
P064-S081-R01	688	3924	719	42	166	21	11	39	180	8	40	6	94	62	129	53	95	0	75	2	17	73	4	0	75	0	17	68	0	25	207	27	71	0	25	0	0	24	0	0	0	36	131	16	23	2	159	0	45
P064-S085-R01	898	1245	872	23	232	16	2	69	228	23	68	11	155	100	211	84	162	3	37	1	10	106	1	0	87	0	20	78	1	34	270	29	93	0	6	0	27	6	0	26	1	4	49	37	179	0	61	1	206
P065-S087-R01	81	307	129	3	0	1	0	0	3	0	5	0	0	0	0	0	0	0	7	0	3	23	0	0	4	0	1	6	0	19	23	5	4	0	18	0	0	18	0	0	0	3	13	5	1	0	17	0	6
P067-S089-R01	21	3839	3106	56	19	3	1	5	28	0	4	20	42	24	81	37	89	0	27	0	33	116	0	0	8	0	5	20	0	22	257	20	13	0	17	0	4	14	3	3	1	22	188	12	34	3	193	1	60
P069-S093-R01	1291	3091	805	9	19	5	0	3	22	2	17	9	31	23	0	15	16	0	9	0	6	33	0	0	12	3	5	23	0	21	72	9	11	0	6	0	15	5	0	15	0	3	18	17	33	0	19	0	53
P074-S268-R01	57	92	5	15	0	1	0	0	40	1	12	9	49	6	26	2	10	1	9	1	10	168	1	5	29	3	52	409	5	24	201	225	119	1	23	0	0	21	2	0	0	74	49	73	4	0	118	0	82
P094-S267-R01	5216	273	240	45	161	38	0	50	97	5	92	62	41	36	43	37	67	13	45	11	57	149	13	11	53	22	28	76	5	86	71	62	33	0	82	0	3	79	2	3	0	12	38	9	10	0	46	0	24
P099-S262-R01	5134	204	15	10	1	2	0	0	0	0	17	0	4	0	0	249	217	0	21	2	0	78	1	0	3	6	0	77	0	8	100	18	55	0	7	0	0	5	2	0	0	4	48	11	36	0	42	0	57
[truncated: 16 more columns]
